# Supplementary material for: Cash transfers for HIV prevention: A systematic review
Source: PLoS Med. 2021 Nov 29;18(11):e1003866. doi: 10.1371/journal.pmed.1003866 (PMC8668130; doi:10.1371/journal.pmed.1003866)
Supplement: S1 Table — (XLSX) [file pmed.1003866.s002.xlsx]

## Sheet: Summary-old
	Intervention	N	HIV infection	Unprotected Sex	Sexual Debut	Number of Partners	Transactional Sex	Older partners	Other STIs	Other Behavioral Outcome
	Cash Transfers	19
	Cash assistance interventions	10	2- signficiant reduction 2- no effect	3- significant reduction 3- no effect 1- significant reduction for girls, no effect boys 1- no effect for women, significant increase men	1- significant reduction 3- no effect 1- No effect girls, significant increase boys	2- no effect 1- significant reduciton 1 measure but not the other 1- significant reduction in women, significant increase in men	1- no effect	1- significant reduction 1- no effect	1- significant reduction syphillis and Trichomoniasis 1- significant reduction HSV-2 2- no effect HSV-2 1- reduction in HSV-2 but not syphillis 1- reduction one STI composite but not the other that included HIV	1- significant reduction in women and significant increase in men combined sex and condom use 1- signficant reduction in sexual intercourse once per week
	National social protection programs	9		7- no effect	3- significant reduction 2- no effect 2- significant reduction for girls, no effect boys 1- significant redcution at midline, not at endline	1- significant reduction 8- no effect 1- significant reduction for girls, no effect boys 1- significant reduciton 1 measure but not the other	4- no effect 1- significant reduction in girls, no effect boys	2- significant reduction 3- no effect 1- significant reduction in girls, no effect boys		1- significant reduction in composite risk score
	Savings	2		1- no effect						1- significant increase in HIV-preventive attitudinal scores 1- significant reduction sex acts for pay
	School Fees	3	1- no effect	1- no effect	2- significant reduction 1- significant reduction for girls, no effect boys	1- no effect			1- no effect

## Sheet: Summary- for girls
	Intervention	N	HIV infection	Other STIs
	Cash Transfers
	Cash assistance interventions	3	1- signficiant reduction 1- no effect 1- too few infections to assess	1- significant reduction HSV-2 1- no effect HSV-2 1- reduction in HSV-2 but not syphillis
	School Fees	1	1- no effect	1- no effect

## Sheet: List of Studies
#	Citation	Target Popultion	Location	Population: Age and Sex	Category	Sample Size	Study Design	HIV	Condom Use	Sexual debut	Number of Partners	Transactional sex	Older Partners	Other STIs	Other
1	1. Ssewamala FM, Han CK, Neilands TB, Ismayilova L, Sperber E. Effect of economic assets on sexual risk-taking intentions among orphaned adolescents in Uganda. Am J Public Health. 2010;100: 483–488. doi:10.2105/AJPH.2008.158840; 2. Jennings L, Ssewamala FM, Nabunya P. Effect of savings-led economic empowerment on HIV preventive practices among orphaned adolescents in rural Uganda: Results from th…	OVC	Uganda	Both; 10–17 years	Savings	346	Cluster RCT								HIV-preventive attitudinal scores β=0.19 (±0.09, p < .05) including condom use and HIV risk perception
2	3. Cho H, Hallfors DD, Mbai II, Itindi J, Milimo BW, Halpern CT, et al. Keeping adolescent orphans in school to prevent human immunodeficiency virus infection: Evidence from a randomized controlled trial in Kenya. J Adolesc Heal. 2011;48: 523–526. 4. Cho H, Catherine Ryberg R, Hwang K, Pearce LD, Iritani BJ. A School Support Intervention and Educational Outcomes Among Orphaned Adolescents: Result…	OVC	Kenya	Females and males; 12–14 years	School costs	835	Cluster RCT	AOR 0.72 (0.15-3.42) p=0.68	AOR 0.012 (-0.12-0.14) p=0.86 at last sex	AOR 0.83 (0.55-1.27) p=0.39	β=-0.45 p=0.07	AOR 0.49 (0.25-0.96) p=0.03		HSV AOR 0.98(0.54-1.78)p=0.94
3	6. Baird SJ, Garfein RS, McIntosh CT, Özler B. Effect of a cash transfer programme for schooling on prevalence of HIV and herpes simplex type 2 in Malawi: A cluster randomised trial. Lancet. 2012;379: 1320–1329. doi:10.1016/S0140-6736(11)61709- 7. Baird S, Chirwa E, Mcintosh C. The short-term impacts of a schooling conditional cash transfer program on the sexual behavior of young women. Health Ec…	Adolescents	Malawi	Females 13–22 years	Structural Individual cash transfer (Both UCT and CCT)	1289	Cluster RCT	HIV Prevalence Adjusted OR: 0.36 (95% CI: 0.14,0.91)	Unprotected AOR 1·08 (95% CI: 0·67–1·75)	AOR 0·64 (95% CI: 0·38–1·07)			AOR 0·21 (95% CI: 0·07–0·62)	HSV-2 AOR: 0.24 (95% CI: 0.09-0.65) Syphillis prevalence AOR 0·92 (95% CI: 0·12–6·85)	Had sexual intercourse once per week AOR 0·46 (0·26–0·82)
4	10. Minnis AM, Vandommelen-Gonzalez E, Luecke E, Dow W, Bautista-Arredondo S, Padian NS. Yo Puedo - A Conditional Cash Transfer and Life Skills Intervention to Promote Adolescent Sexual Health: Results of a Randomized Feasibility Study in San Francisco. J Adolesc Heal. 2014;55: 85–92. doi:10.1016/j.jadohealth.2013.12.00	Adolescents	US	Females and males 16–21, self-identify as Latino	Structural Individual cash transfer (CCT)	162	Social network randomized RCT		Unprotected AOR 0.42, (p=0.12)	OR = 0.50, (p = 0.04)
5	11. De Walque D, Dow WH, Nathan R, Abdul R, Abilahi F, Gong E, et al. Incentivising safe sex: A randomised trial of conditional cash transfers for HIV and sexually transmitted infection prevention in rural Tanzania. BMJ Open. 2012;2: e000747. doi:10.1136/bmjopen-2011-000747 12. Cooper JE, McCoy SI, Fernald LCH, de Walque D, Dow WH. Women’s Relationship Power Modifies the Effect of a Randomized Co…	Adults	Tanzania	Females and males; 18–30 years	Incentive-based Individual cash transfer (CCT)	2399	RCT							STI incidence (Chlamydia trachomatis, Neisseria gonorrhoeae, Trichomonas vaginalis, Mycoplasma genitalium); Adjusted RR high-value : 0.73 (95% CI: 0.47-0.99) Adjusted RR low-value transfer arm: 0.69 (95% CI: 0.45-0.92) Combined measure of HIV, herpes simplex virus 2, syphilis. Prevalence High-value CCT ARR 1.03 (95% CI: 0.74 - 1.32); Low-value CCT; ARR 0.82 (95% CI: 0.60 - 1.03)	cash was not associated with change in behavior at round 2 overall β=0.169 se=0.104; but was for women only β-0.345, se=0.14, p <0.05
6	14. Handa S, Halpern CT, Pettifor A, Thirumurthy H. The government of Kenya’s cash transfer program reduces the risk of sexual debut among young people age 15-25. PLoS ONE. 2014;9: e85473. doi:10.1371/journal.pone.0085473. 15. Rosenberg M, Pettifor A, Thirumurthy H, Halpern CT, Handa S. The impact of a national poverty reduction program on the characteristics of sex partners among Kenyan adolesce…	OVC- HH	Kenya	Females and males; age 15–25	Government cash transfer (UCT)	2210 HH; 1429 youth	Cluster RCT		At last sex AOR 1.199 (95% CI: 0.826 – 1.741); Any unprotected last 3 months AOR 0.901 (95% CI: 0.473 – 1.717)	AOR, 0.69 (95% CI: 0.53 – 0.89)	AOR 0.584 (95% CI: 0.262 – 1.305)	AOR 0.843 (95% CI: 0.461 – 1.539)	Women AOR 0.94 (95% CI 0.55-1.62, chi sq=0.05, p=0.83) or Men AOR 0.76 (95% CI 0.43-1.33, chi sq=0.93, p=0.33)
7	17.Pettifor A, MacPhail C, Hughes JP, Selin A, Wang J, Gómez-Olivé FX, et al. The effect of a conditional cash transfer on HIV incidence in young women in rural South Africa (HPTN 068): a phase 3, randomised controlled trial. Lancet Glob Heal. 2016;4: e978–e988. doi:10.1016/S2214-109X(16)30253-4	Adolescents	South Africa	Females 13–20	Structural Individual cash transfer (CCT)	2533	RCT	Incidence AOR 1·17 (95% CI 0·80–1·72, p=0·42).	Unprotected RR 0·81 (95% CI: 0·67 - 1·0)	HR 0·92 (95% CI: 0·78 - 1·08)	Any sex partner in last 12 months RR 0·90 (95% CI: 0·83 - 0·99) Had >1 sex partner in last 12 months RR 0·86 (95% CI: 0·67 - 1·1)	RR 0·95 (95% CI: 0·78 - 1·15)	RR 0·90 (95% CI: 0·72 - 1·12)	HSV-2 HR 0·90 (95% CI: 0·69 - 1·19)
8	18. Cluver L, Boyes M, Orkin M, Pantelic M, Molwena T, Sherr L. Child-focused state cash transfers and adolescent risk of HIV infection in South Africa: A propensity-score-matched case-control study. Lancet Glob Heal. 2013;1: e362–e370. doi:10.1016/S2214-109X(13)70115-3 19. Cluver 2014;Cluver LD, Orkin FM, Boyes ME, Sherr L. Cash plus care: social protection cumulatively mitigates HIV-risk behavi…	Adolescents- HH	South Africa	Females and males; age 12–18	Government cash transfer (UCT)	2688	Case control		Unprotected sex girls AOR 0·91 (95% CI: 0·64–1·30); boys AOR 0·77 (95% CI: 0·52–1·15)		multiple partners girls AOR 0·77 (95% CI: 0·50–1·19); boys AOR 0·67 (95% CI: 0·46–0·97)	girls lower incidence of transactional sex AOR 0.49 (95% CI 0·26–0·93); boys AOR 1·10 (95% CI: 0·47–2·66)	girls lower age-disparate sex AOR OR 0.29 (95% CI 0·13–0·67); boys AOR 0·67 (95% CI: 0·27–1·63)		one or more of four high-risk behaviours (Condom use, multiple partners, sex while intoxicated, sex before age 15). cash social protection was significantly reduced HIV-risk behaviour AOR 0.69 (95% CI: 0.50–0.95)
9	21. Galárraga O, Sosa-Rubí SG, Kuo C, Gozalo P, González A, Saavedra B, et al. Punto Seguro: A Randomized Controlled Pilot Using Conditional Economic Incentives to Reduce Sexually Transmitted Infection Risks in Mexico. AIDS Behav. 2017;21: 3440–3456. doi:10.1007/s10461-017-1960-x 22. Galárraga O, Sosa‐Rubí SG, González A, Badial‐Hernández F, Conde‐Glez CJ, Juárez‐Figueroa L, Bautista‐Arredondo S,…	Male Sex Workers	Mexico	Male sex workers age 18–40; MSM	Incentive-based Individual cash transfer (Both UCT and CCT)	227	RCT		Unprotected Medium incentive β=0.100 (se=0.056, P=<0.10) for staying STD free, high incentive STD free β=0.113 (se=0.060), p=<0.10		Medium incentive β=−0.133 (se=0.880) for staying STD free, high incentive STD free β=−0.115 (se=0.944)			composite incident STIs (chlamydia, gonorrhea, syphilis, and HIV) was Medium incentive β:0.023 (se=0.024) for staying STD free, high incentive STD free β:0.044 (se=0.034)
10	23. Goodman ML, Kaberia R, Morgan RO, Keiser PH. Health and livelihood outcomes associated with participation in a community-based empowerment program for orphan families in semirural Kenya: a cross-sectional study. Vulnerable Child Youth Stud. 2014;9: 365–376. doi:10.1080/17450128.2014.938142. 24. Goodman ML, Selwyn BJ, Morgan RO, Lloyd LE, Mwongera M, Gitari S, et al. Sexual Behavior among Youn…	OVC- HH	Kenya	OVC-headed households (aged 13 to 25); Females and males	Structural Individual cash transfer (CCT)	1060	Observational		unprotected sex girls (cohort 3 vs 1 OR 0.31 (95% CI: 0.11–0.86) p<0.05), ( cohort 2 vs 1. OR 0.36 (95% CI: 0.18–0.76) p<0.01). Males were the opposite (Cohort 3: OR 1.28 (95% CI: 0.4–3.89)) and (Cohort 2: OR 3.05 (95% CI: 1.27–7.35) (p<0.05)	Sexual debut (Cohort 3 vs 1. OR 0.48 (95% CI: 0.23–0.99) p<0.05). (Cohort 2 vs 1 OR 0.62 (95% CI: 0.32–1.19)). Males were the opposite: (Cohort 3: OR 1.16 (95% CI: 0.60–2.21)) and (Cohort 2: OR 1.94 (95% CI: 0.94–3.98) p<0.1)	Multiple partners ; Females (Cohort 3; OR 1.05 (95% CI: 0.42–2.6)).( Cohort 2; OR 0.93 (95% CI: 0.43–2.05)). Males (Cohort 3: OR 1.2 (95% CI: 0.51–2.79)) and (Cohort 2: OR 1.65 (95% CI: 0.69–3.94)
11	25. Nyqvist MB, Corno L, de Walque D, Svensson J. Incentivizing safer sexual behavior: Evidence from a lottery experiment on HIV prevention. Am Econ J Appl Econ. 2018;10: 287–314. doi:10.1257/app.20160469	Adults	Lesotho	Females and males; age 18–32	Incentive-based Individual cash transfer (CCT)	3029	RCT	incidence any lottery β= -0.025 (se=-0.013, p-value=0.046) Prevalance β=- 0.034 (se=0.018, p=0.044)	Any number of unprotected sex acts: any lottery β=10.85 (se=5.89, p-value<0.10); high lottery β=-15.53 (se=6.95, p-value<0.05); low lottery β=-5.39 (se=7.65)					STI prevalence (Syphillis and Trichomonoasis) ; Pooled internveiton β=-0.032 (se=0.009, p-value=<0.001); high incentive β=-0.034 (se=0.010, p-value=<0.001); low incentive β=-0.031, (se=0.010, p-value=<0.001); among HIV positive any incentive β -0.108 (se=0.039, p-value=<0.001)
12	26. Hallfors DD, Cho H, Rusakaniko S, Mapfumo J, Iritani B, Zhang L, et al. The impact of school subsidies on HIV-related outcomes among adolescent female orphans. J Adolesc Heal. 2015;56: 79–84. doi:10.1016/j.jadohealth.2014.09.004. 27. Hallfors D, Cho H, Rusakaniko S, Iritani B, Mapfumo J, Halpern C. Supporting adolescent orphan girls to stay in school as HIV risk prevention: Evidence from a ra…	OVC	Zimbabwe	Orphan girls in grade 6 at baseline	School costs	328	Cluster RCT	Prevalence AOR 1.15 (95% CI: 0.47-2.79) in study no effect		AOR 0.52 (95% CI: 0.23-1.21) in study.				HSV-2 AOR 1.46 (95% CI: 0.50-4.26)
13	29. Heinrich CJ, Hoddinott J, Samson M. Reducing Adolescent Risky Behaviors in a High-Risk Context: The Effects of Unconditional Cash Transfers in South Africa. Econ Dev Cult Change. 2017;65: 619–652.	adolescents- HH	South Africa	Females and males; age 15-17	Government cash transfer (UCT)	1531	Observational			Interrupted months of CSG receipt (β=0.055, se 0.030, p=0.071) no difference for males β=0.047, se=0.044, p=0.293. Receipt in adolescence females (β:= 0.096, se=0.040, p-value=0.018); males (β=0.030, se=0.051, p-value= 0.560)	Partner number; months with grant (females: β= -0.235, se=0.090 p=0.009). No difference for males β =0.144, se=0.108, p=0.182. For females, receiving grant early (β= -0.243, se=0.120, p=0.043) . For males (β=0.456, se=0.212, p=0.031)
14	30. Witte SS, Aira T, Tsai LC, Riedel M, Offringa R, Chang M, et al. Efficacy of a savings-led microfinance intervention to reduce sexual risk for HIV among women engaged in sex work: A randomized clinical trial. Am J Public Health. 2015;105: e95–e102. doi:10.2105/AJPH.2014.302291	female sex workers	Mongolia	females age 18+ involved in street-based sex work	Savings	107	Group RCT		Unprotected IRR 1.08 (95% CI: 0.45 -1.72), group · time interaction (IRR 1.01 (95% CI: 0.92- 1.09)).						No. Unprotected Vaginal Sex Acts for Pay Poisson, IRR 0.78 (95% CI: 0.67-0.71).
15	31. Duflo, ED.; Pascaline; Kremer, Michael; Sinei, Samuel. Education and HIV/AIDS prevention: evidence from a randomized evaluation in Western Kenya. 2006. World Bank. 32. Duflo E, Dupas P, Kremer M. Education, HIV, and early fertility: Experimental evidence from Kenya. Am Econ Rev. 2015;105: 2757–97. doi:10.1257/aer.20121607	Adolescents	Kenya	Grade 6 at enrollment (both boys and girls)	School costs	70,000 328 schools	Cluster RCT		Ever used condom (Girls) β: 0.003; (se=0.019); boys β:-0.003; (se=0.016) Condom at last sex (girls) β: 0.024, (se= 0.019); boys β:0.011, (se=0.014)	Ever had sex (girls) β: -0.023( se=0.004, p-value<0.05); boys: β:0.008,( se=0.015)	>1 partner (girls) β: -0.001; (se=0.004); boys β:-0.001; (se=0.010); both not significant
16	33. Siaplay M. The Impact of Social Cash Transfers on Young Adults’ Labor Force Participation, Schooling, and Sexual Behaviors in South Africa. Oklahoma State University. 2012. Available: https://shareok.org/bitstream/handle/11244/6722/Department of Economics and Legal Studies_14.pdf?sequence=1	Adolescent- HH	South Africa	Females and males; ages 14-26	Government cash transfer (UCT)	3307	Observational		Unproteced β=-0.064 for females and β=-0.041 for males.	Young adult females sexual debut. β=- 0.168 , p<0.05 and β=-0.136, p<0.10 (without and with attrition correction, respectively). A male receiving the pension has no significant effect on the probability of young adults starting sex.	Effect size (for any OAP, with attrition correction) β= 0.031 for females and β=-0.054 for males
17	34. American Institutes for Research (AIR). Zambia’s Multiple Category Targeting Grant: 36-Month Impact Report. Washington, DC; 2015. Available: https://transfer.cpc.unc.edu/wp-content/uploads/2015/09/Zambia-MCTG-36-Mo-Report.pdf	Adolescent- HH	Zambia	HH with OVC. Females and males; 13-17 at baseline	Government cash transfer (UCT)	3077 HH	RCT		36 month impact on condom use at first sex β== 0.010 but not statistically significant among n=1,070 adolescents who had not debuted at baseline. 36 month impact on no condom use in last 3 months among those with reported sexual activity (n=1,077) β= -0.032 but not statistically significant. 36 month impact on no condom use in last 12 months among n=1422 adolescents β= -0.018 but not statisticall…	36 month impact on age at first sex β= -0.101 but not statistically significant among n=1,070 adolescents who had not debuted at baseline. The 36 month impact on ever had sex was 0.008 but not statistically significant among n=3,249 adolescents who had not sexually debuted at baseline.	36 month impact on number of partners in last 12 months among adolesents reporting having a partner β= -0.332 (n=2089) but not statistically significant.	36 month impact on ever expereinced transactional sex was β=0.016 among 1756 adolescents but this was not statistically significant.	36 month impact on partner age at first sex > 10 years olderβ= 0.039 and statistically significant at 5% level among n=1,070 who had not debuted at baseline.
18	35. Abdoulayi UNCS, Angeles G, Barrington C, Brugh K, Handa S, Molotsky A, et al. Malawi Social Cash Transfer Programme Endline Impact Evaluation Report. 2016. Available: https://transfer.cpc.unc.edu/tools/reports/malawi-reports/	Adoelscent HH	Malawi	Females and males; 13-19	Government cash transfer (UCT)	3521 HH; 2,325 yout at endline	RCT		condom use at first sex endline β=-0.048 (t-statistic=-1.20). Condom use at last sex endline β=-0.019 (t-statistic=-0.51, N=478); Unprotected sex (last 3 months) endline β=0.023 (t-statistic=0.41 N=308)	delay their first sexual encounter at endline all households β: -0.024 (t-statistic=-0.74, not significant) midline (β:-0.062, t-statistic=-3.41, p<0.01). males β:0.017, (t-statistic= 0.38, N=798, not significant) midline β:=-0.085, t-statistic=-4.26, p<0.01; females β: -0.058, (t-statistic=-1.29, N=837, not significant) midline β: -0.039, (t-statistic=-1.69,, not significant)	Number of sexual partners endline β=-0.118, (t-statistic=-1.27, N=478)	Ever TS endline β=-0.016,( t-statistic= -0.32, N=680)	First sex age disparate partner (>5 years) endline β= -0.033, ( t-statistic=-2.49, p<0.01) Age disparate partner, age>5 years (β=-0.091, t-statistic=-3.76, N=459, p<0.01)
19	36. Tanzania Cash Plus Evaluation Team. A Cash Plus Model for Safe Transitions to Healthy and Productive Adulthood: Baseline Report. Florence, Italy; 2018. Available: https://www.unicef-irc.org/publications/943-a-cash-plus-model-for-safe-transitions-to-a-healthy-and-productive-adulthood-baseline.html	Adolescent- HH	Tanzania	Females and males; 14 and 28 years at baseline	Government cash transfer (UCT)	1397 youth	Cluster RCT		Did not use condom at last sex (within last 12 months) overall β=-0.008, (t-stat=-0.235, N=1,992) Females β=-0.034, (t-stat=-0.691, N=1,004) males β=0.012, (t-stat=0.214, N=988)	everyone β=0.018, (t-stat=0.436, N=1,978); females β=0.005, (t-stat=0.098, N=1,002); males β=0.024, (t-stat=0.379, N=976)	Lifetime number of partners everyont β=0.212, ( t-stat=0.634, N=1,960) females β=-0.232, ( t-stat=-1.022, N=998); males β=0.612, ( t-stat=1.081, N=962) . Partners in the last 12 monts everyone β=0.140, ( t-stat=1.027, N=1,978) females β=0.089, ( t-stat=0.678, N-1,002) males β=0.183, (t-stat=0.809 , N=976)	Received food, favours, gifts or money for sex everyone β=0.011, ( t-stat=0.389, N=1,842) also no effect when split by female and male.	Last sex: partner 5 or more years older/younger everyone β=0.010, (t-stat=0.307, N=1,696) females β=-0.002, ( t-stat=-0.041, N=898) males β=0.021, ( t-stat=0.670, N=798)
20	37. Kohler HP, Thornton RL. Conditional cash transfers and HIV/AIDS prevention: unconditionally promising? World Bank Econ Rev. 2011;26: 165–190.	Adolescents and Adults	Malawi	Females and males; 16–75 years	Incentive-based Individual cash transfer (CCT)	1307 individuals	RCT	No effect HIV status at round 3 β=0.001, (robust SE=0.005)	Unprotected sex Women: No effect (β=0.002, se=0.032); Men Absolute change: (0.069, se=0.032, p<0.01)		Any vaginal sex: men β:0.129** (se=0.047, p<0.01), women β:−0.085 (se=0.040, P<0.01); days vaginal sex: men 0.531 (se=0.208, p<0.01); women −0.216 (se=0.174)				Reported using a condom or reported not having sex : women ( β: 0.075, se=0.038, p<0.10); Men Absolute change: ( β:-0.085, se=0.044, P<0.10)
21	38. Department of Social Development, SASSA, UNICEF. The South African Child Support Grant Impact Assessment. Evid from a Surv Child Adolesc their households. Pretoria; 2012. Available: http://www.unicef.org/southafrica/SAF_resources_csg2012s.pdf	Adoelscent- HH	South Africa	Females and males; 15- to 17-year-olds	Government cash transfer (UCT)	1231 adoelscents	Observational			Ever had sex β:=0.160 se=0.060 t-statistic=2.66
22	39. American Institutes for Research (AIR). 12-Month Impact Report for Zimbabwe’s Harmonised Social Cash Transfer Programme. Washington DC; Available: https://transfer.cpc.unc.edu/tools/reports/zimbabwe-reports 40. Zimbabwe Harmonised Social Cash Transfer Evaluation Team. Zimbabwe’s Harmonised Social Cash Transfer Programme Endline Impact Evaluation Report. 2018. Available: https://transfer.cpc.u…	Adoelscent- HH	Zimbabwe	Females and males; 13 to 24 years	Government cash transfer (UCT)	2,567 households; 2310 youth	Control comparison		condom used at first sex β:-0.067, (t-statistic=-1.27)- not significant. Had unprotected sex in past 3 months β:-0.047 (t-statistic=-2.33)	ever had sex β:-0.089, (t-statistic=-2.55, p<0.05)	Number of partners last 12 months β:0.157, (t-statistic=1.57)		age of partner at first sex β:-0.251, (t-statistic=-0.41). Girls β:0.051, (t-statistic=0.06). Boys: β:-0.384, (t-statistic=-1.32). Most recent sex partner's age β:-0.334,( t-statistic=-0.65)
23	41. Galárraga O, Gertler PJ. Conditional cash & adolescent risk behaviors: Evidence from urban Mexico. Policy Research Working Paper. 2009 Dec 15.	Adolescents	Mexico	Females and males; 12–24 years of age	Structural Individual cash transfer (CCT)	3,743 individuals	Observational		Condom during first sexual intercourse (girls) impact of enrollement β: 0.274 , se=0.389; factors in length of time in program β: -0.020, se=0.034- not significant Condom at last sexual intercourse (girls) β: 0.173 , se=0.172 β: -0.021 se=0.017- not significant Condom during first sexual intercourse (boys) IV: 0.818 81.8% increase IV: -0.069, 6.9% decrease Condom at last sexual intercourse (boys)…	Sexually active (girls) β: 0.061 se=0.388(impact of enrollment) β: -0.004 se=0.035(factors in length of time in program) -no significant Sexually active (boys) β: -0.326, se=0.558 β: 0.034, se=0.047- not significant
24	42. Karim QA. Impact of conditional cash incentives on HSV-2 and HIV in rural high school students in South Africa. 8th IAS Conference on HIV Pathogenesis, Treatment & Prevention. Vancouver, Canada; 2015.	Adolescents	South Africa	Females and males ; 13 years of age and older Grade 9– 10	Structural Individual cash transfer (CCT)	2949 youth	school matched pair cluster randomised control trial	Too few HIV infections (n=75) to assess impact on HIV						HSV-2 Incidence rate ratio: 0.70 (95% CI: 0.57 - 0.86; p = 0.007)
25	43. Gorgens M, Longosz AF, Ketende S, Nkambule M, Dlamini T, Mabuza M, et al. Evaluating the effectiveness of incentives to improve HIV prevention outcomes for young females in Eswatini: Sitakhela Likusasa impact evaluation protocol and baseline results. BMC Public Health. 2020;20: 1591. doi:10.1186/s12889-020-09680-8	Adolescents	eSwatini	females age 15-22 at baseline	Structural Individual cash transfer (CCT) and incentive-based Individual cash transfer (CCT)	4329	2 x 2 factorial randomized trial with 4 intervention groups	Structural intervention alone (OR 0 .77; 95% CI 0.60- 0.98). Incentive alone(OR 0.833 95% CI 0.648 -1.070). Education plus the raffle (OR 0.63; 95% CI 0.44, 0.91)
26	44. Schaefer R, Thomas R, Robertson L, Eaton JW, Mushati P, Nyamukapa C, et al. Spillover HIV prevention effects of a cash transfer trial in East Zimbabwe: evidence from a cluster-randomised trial and general-population survey. BMC Public Health. 2020;20: 1599. doi:10.1186/s12889-020-09667-	Adolescents and Adults	Zimbabwe	females and males age group 15–29 years and aged 30–54 years	Structural household cash transfer (CCT and UCT)	3516	Linked data from the Mancialand Cohort data to the the Manicaland Trial. The trial was a three arim cluster RCT of UCTs and CCTs.		No effect; Males aged 15-29 β 2.68 (95% CI − 11.6, 17.0), females β=-0.19 (95% CI −8.24, 7.86)	No effect sexual debut among males 15-29 β: 1.43 [95% CI: -3.18, 6.05) and females 15-29 β: −5.68 (− 15.7, 4.35).	No effect among males 15-29 β: 8.49 (−5.40, 22.4)
27	45. Moscoe E, Agot K, Thirumurthy H. Effect of a Prize-Linked Savings Intervention on Savings and Healthy Behaviors Among Men in Kenya: A Randomized Clinical Trial. JAMA Netw open. 2019;2: e1911162. doi:10.1001/jamanetworkopen.2019.11162	Adults	Kenya	Adult men over 21 years old engaged in fishing or transportation sector work	Savings (prize-linked)	300	RCT					Any TS= β (SE) −0.00 (0.07)

## Sheet: Summary
	Intervention	N	HIV infection	Unprotected Sex	Sexual Debut	Number of Partners	Transactional Sex	Older partners	Other STIs	Other Behavioral Outcome
	Cash Transfer	17	2- signficiant reduction 2- no effect	3- significant reduction 11- no effect 1- significant reduction for girls, no effect boys	5- significant reduction 5- no effect 2- significant reduction for girls, no effect boys 2- signifcant reducation girls, significant increase boys	1- significant reduction 8- no effect 1- significant reduction for girls, no effect boys 1- significant reduciton 1 measure but not the other	5- no effect 1- significant reduction in girls, no effect boys	3- significant reduction 4- no effect 1- significant reduction in girls, no effect boys	1- significant reduction syphillis and Trichomoniasis 1- significant reduction HSV-2 2- no effect HSV-2 1- reduction in HSV-2 but not syphillis 1- reduction one STI composite but not the other that included HIV	1- significant reduction in composite risk score 1- significant reduction in women and significant increase in men
	Savings	2		1- no effect			1- significant reduction			1- significant increase in HIV-preventive attitudinal scores
	School Fees	3	1- no effect	1- no effect	3- significant reduction	1- no effect			1- no effect

## Sheet: Sheet1
			No effect	2
			Significant Reduction	1

## Sheet: More refined list-old
#	Citation	Target Popultion	Location	Population: Age and Sex	Category	Sample Size	Study Design	HIV	Condom Use	Sexual debut	Number of Partners	Transactional sex	Older Partners	Other STIs	Other	More desciption of study
1	Ssewamala 2010, Jennings 2015	OVC	Uganda	Both; 10–17 years	Savings	346	Cluster RCT								HIV-preventive attitudinal scores (b = +0.19, ±0.09, p < .05) including condom use and HIV risk perception	matched CSA held in the adolescent orphan’s name. Conditional Attending 12 asset building and financial planning workshops
2	Cho 2011, Cho 2017	OVC	Kenya	Females and males; 12–14 years	school costs	105	Cluster RCT			β=−1.50(0.07 p-value)]						unconditional
3	Baird 2012, Baird 2010, Baird 2017	Adolescents	Malawi	Females 13–22 years	Individual cash transfer (Both UCT and CCT)	1289	Cluster RCT	HIV Prevalence Adjusted OR: 0.36 (95% CI: 0.14,0.91)**	Unprotected AOR 1·08 (0·67–1·75)	AOR 0·64 (0·38–1·07)			AOR 0·21 (0·07–0·62)*	HSV-2 Adjusted OR: 0.24 (95% CI: 0.09,0.65)**2 Syphillis prevalence AOR 0·92 (0·12–6·85)		CCT (based on at least 80% school attendance) or UCT
4	Minnis 2014	Adolescents	US	Females and males 16–21, self-identify as Latino	Individual cash transfer (CCT)	162	Social etwork randomized RCT		Unprotected AOR 0.42, P=0.12	OR = 0.50, p = 0.04*						conditional on documented completion of the given activity
5	De Walque 2012 (PR); Cooper 2018;	Adults	Tanzania	Females and males; 18–30 years	Individual cash transfer (CCT)	2399	RCT							STI incidence (Chlamydia trachomatis, Neisseria gonorrhoeae, Trichomonas vaginalis, Mycoplasma genitalium); Adjusted RR high-value : 0.73 (95% CI: 0.47,0.99)** Adjusted RR low-value transfer arm: 0.69 (95% CI: 0.45,0.92)** Combined measure of HIV, herpes simplex virus 2, syphilis. Prevalence High-value CCT (95% CI) ARR1.03 (0.74 to 1.32); Low-value CCT (95% CI); 0.82 (0.60 to 1.03)		Low and High amounts Conditional Negative STI test
6	Handa 2014, Rosenberg 2014;Handa 2017	OVC- HH	Kenya	Females and males; age 15–25	Government cash transfer (UCT)	2210 HH; 1429 youth	Cluster RCT		At last sex AOR 1.199 (0.826 – 1.741); Any unprotected last 3 months AOR 0.901 (0.473 – 1.717)	AOR, 0.69; CI, 0.53 – 0.89*.	AOR 0.584 (0.262 – 1.305)	AOR 0.843 (0.461 – 1.539)	Women AOR 0.94 (0.55, 1.62), chi sq=0.05, p=0.83) or Men (AOR 0.76 (0.43, 1.33), X2=0.93, P=0.33)			unconditional
7	Pettifor 2016	Adolescents	South Africa	Females 13–20	Individual cash transfer (CCT)	2533	RCT	Incidence AOR 1·17 (95% CI 0·80–1·72, p=0·42).	Unprotected RR 0·81 (0·67 to 1·0)	HR 0·92 (0·78 to 1·08)	Any sex partner in last 12 months RR 0·90 (0·83 to 0·99)* Had >1 sex partner in last 12 months RR 0·86 (0·67 to 1·1)	RR 0·95 (0·78 to 1·15)	RR 0·90 (0·72 to 1·12)	HSV-2 HR 0·90 (0·69 to 1·19)		conditional on school attendance (≥80% of school days per month)
8	Cluver 2013; Cluver 2014; Cluver 2017	Adolescents- HH	South Africa	Females and males; age 12–18	Government cash transfer (UCT)	2688	Case control		Unprotected sex girls 0·91 (0·64–1·30); boys 0·77 (0·52–1·15)		multiple partners girls 0·77 (0·50–1·19); boys 0·67 (0·46–0·97)	girls lower incidence of transactional sex (OR = 0.49, p = 0.028); boys 1·10 (0·47–2·66)	girls lower age-disparate sex (OR = 0.29 p = 0.004); boys 0·67 (0·27–1·63)		one or more of four high-risk behaviours (Condom use, multiple partners, sex while intoxicated, sex before age 15). cash social protection was significantly reduced HIV-risk behaviour (OR 0.69 CI 0.50–0.95)	unconditional
9	Galárraga 2017;	Male Sex Workers	Mexico	Male sex workers age 18–40; MSM	Individual cash transfer (Both UCT and CCT)	227	RCT		Unprotected Medium incentive (β=0.100*, se=0.056) for staying STD free, high incentive STD free (β=0.113*, se=0.060)		Medium incentive (β=−0.133 (se=0.880)) for staying STD free, high incentive STD free (β=−0.115 (se=0.944))			composite incident STIs (chlamydia, gonorrhea, syphilis, and HIV) was Medium incentive ( β:0.023 (se=0.024)) for staying STD free, high incentive STD free ( β:0.044 (se=0.034))		arms 1 and 2 were conditional on STI status, unconditional arm 3
10	Goodman 2014; Goodman 2016	OVC- HH	Kenya	OVC-headed households (aged 13 to 25); Females and males	Individual cash transfer (CCT)	1060	Observational		unprotected sex girls (cohort 3 vs 1 OR 0.31 (0.11–0.86) p<0.05), ( cohort 2 vs 1. OR 0.36 (0.18–0.76) p<0.01). Males were the opposite (Cohort 3: OR 1.28 (0.4–3.89)) and (Cohort 2: OR 3.05 (1.27–7.35) (p<0.05)	Sexual debut (Cohort 3 vs 1. OR 0.48 (0.23–0.99) p<0.05). (Cohort 2 vs 1 OR 0.62 (0.32–1.19)). Males were the opposite: (Cohort 3: OR 1.16 (0.60–2.21)) and (Cohort 2: OR 1.94 (0.94–3.98) p<0.1)	Multiple partners ; Females (Cohort 3; OR 1.05 (0.42–2.6)).( Cohort 2; OR 0.93 (0.43–2.05)). Males (Cohort 3: OR 1.2 (0.51–2.79)) and (Cohort 2: OR 1.65 (0.69–3.94)					Community-conditioned. Cash transfer decisions are facilitated by the working group through majority vote and are conditioned on the needs and survival strategies of participants. greater effects on partner number and condom use for females in the program longer
11	Nyqvist 2018	Adults	Lesotho	Females and males; age 18–32	Individual cash transfer (CCT)	3029	RCT	incidence (β= -0.025** p-value=-0.013) Prevalance (β=- 0.034*,p-value=0.018)	Any number of unprotected sex acts: any lottery (β=10.85*, se=5.89); high lottery (β=-15.53**, se=6.95); low lottery (β=-5.39, se=7.65)					STI prevalence (Syphillis and Trichomonoasis) ; Pooled internveiton β=-0.032*** se=0.009; high incentive (β=-0.034***(0.010)); low incentive β=-0.031***, (0.010); among HIV positive any incentive β -0.108***(0.039)		Lottery incentive scheme (two prize levels: high prize of USD 100 and low prize of USD 50) held every 4 months for 2 years in which those who test negative for 2 curable STIs were eligibe
12	Hallfors 2015; Halifors 2011; Luseno 2015	OVC	Zimbabwe	Orphan girls in grade 6 at baseline	School costs	328	Cluster RCT	Prevalence AOR 1.15 (.47-2.79) in study no effect		AOR .52 (.23-1.21) in study.				HSV-2 AOR 1.46 (0.50-4.26)
13	Heinrich 2017	adolescents- HH	South Africa	Females and males; age 15-17	Government cash transfer (UCT)	1531	Observational			As the number of months of CSG receipt increases (difference ATE=0.055, se 0.030, p=0.071) no difference for males 0.047, se=0.044, p=0.293. Receipt in adolescence females (difference= 0.096, se=0.040, p-value=0.018); males (difference=0.030, se=0.051, p-value= 0.560)	Partner number; months with grant (females: difference ATE= 0.235, se=0.090 p=0.009). No difference for males β =0.144, se=0.108, p=0.182. For females, receiving grant early (β= -0.243, se=0.120, p=0.043) . For males (β=0.456, se=0.212, p=0.031)					unconditional
14	Witte 2015	female sex workers	Mongolia	females age 18+ involved in street-based sex work	savings	107	Group RCT		Unprotected (IRR 1.08 (0.45, 1.72)), group · time interaction (P > .05; 1.01 (0.92, 1.09)).			No. Unprotected Vaginal Sex Acts for Pay Poisson, (IRR 0.78** (0.67, 0.71).
15	Duflo 2006; Duflo 2015	Adolescents	Kenya	Grade 6 at enrollment (both boys and girls)	School costs	70,000 328 schools	Cluster RCT		Ever used condom (Girls) β: 0.003; se=0.019; boys β:-0.003; se=0.016 Condom at last sex (girls) β: 0.024, se= 0.019; boys β:0.011, se=0.014	Ever had sex (girls) β: -0.023** se=0.004; boys: β:0.008, se=0.015	>1 partner (girls) β: -0.001; se=(0.004); boys β:-0.001; se=(0.010); both not significant					unconditional
16	Siaplay 2012	Adolescent- HH	South Africa	Females and males; ages 14-26	Government cash transfer (UCT)	3307	Observational		Unproteced β=-0.064 for females and β=-0.041 for males.	oung adult females sexual debut. (β=- 0.168** and β=-0.136*, without and with attrition correction, respectively). A male receiving the pension has no significant effect on the probability of young adults starting sex.	Effect size (for any OAP, with attrition correction) 0.031 for females and -0.054 for males					The South African Old-Age Pension (OAP): A government pension program that provideda monthly cash transfer of up to $75 USD to poor women more than 60 years old and poor men more than 65 years oold. unconditional
17	AIR 2015	Adolescent- HH	Zambia	HH with OVC. Females and males; 13-17 at baseline	Government cash transfer (UCT)	3077 HH	RCT		36 month impact on condom use at first sex β== 0.010 but not statistically significant among n=1,070 adolescents who had not debuted at baseline. 36 month impact on no condom use in last 3 months among those with reported sexual activity (n=1,077) β= -0.032 but not statistically significant. 36 month impact on no condom use in last 12 months among n=1422 adolescents β= -0.018 but not statisticall…	36 month impact on age at first sex β= -0.101 but not statistically significant among n=1,070 adolescents who had not debuted at baseline. The 36 month impact on ever had sex was 0.008 but not statistically significant among n=3,249 adolescents who had not sexually debuted at baseline.	36 month impact on number of partners in last 12 months among adolesents reporting having a partner (n=2089) = -0.332 but not statistically significant.	36 month impact on ever expereinced transactional sex was 0.016 among 1756 adolescents but this was not statistically significant.	36 month impact on partner age at first sex > 10 years older = 0.039 and statistically significant at 5% level among n=1,070 who had not debuted at baseline.			unconditional
18	Malawi Social Cash Transfer Program Evaluation Team 2016	Adoelscent HH	Malawi	Females and males; 13-19	Government cash transfer (UCT)	3521 HH; 2,325 yout at endline	RCT		condom use at first sex endline (β=-0.048, se=-1.20). Condom use at last sex (endline β=-0.019, se=-0.51 N=478); Unprotected sex (last 3 months) endline (β=0.023, se=0.41 N=308)	delay their first sexual encounter at endline all households β: -0.024 t-stat:-0.74. males ( β:0.017, t-stat: 0.38, N=798); females ( β: -0.058, t-stat:-1.29, N=837).	Numbe of sexual partners endline (β=-0.118, se=-1.27, N=478)	Ever TS endline (β=-0.016, se= -0.32, N=680)	First sex age disparate partner (>5 years) endline(β= -0.033**, se=-2.49) partner age at first sex endline (β=-0.513*, se=-1.77)			unconditional cash transfer programme targeted to ultra-poor, labour-constrained households.
19	UNICEF 2018	Adolescent- HH	Tanzania	Females and males; 14 and 28 years at baseline	Government cash transfer (UCT)	1397 youth	Cluster RCT		Did not use condom at last sex (within last 12 months) overall (β=-0.008, t-stat=-0.235, N=1,992) Females (β=-0.034, t-stat=-0.691, N=1,004) males (β=0.012, t-stat=0.214, N=988)	everyone β=0.018, t-stat=0.436, N=1,978; females β=0.005, t-stat=0.098, N=1,002; males β=0.024, t-stat=0.379, N=976	Lifetime number of partners everyont (β=0.212, t-stat=0.634, N=1,960) females (β=-0.232, t-stat=-1.022, N=998); males (β=0.612, t-stat=1.081, N=962) . Partners in the last 12 monts everyone (β=0.140, t-stat=1.027, N=1,978) females (β=0.089, t-stat=0.678, N-1,002) males (β=0.183, t-stat=0.809 , N=976)	Received food, favours, gifts or money for sex everyone (β=0.011, t-stat=0.389, N=1,842) also no effect when split by female and male.	Last sex: partner 5 or more years older/younger everyone (β=0.010, t-stat=0.307, N=1,696) females (β=-0.002, t-stat=-0.041, N=898) males (β=0.021, t-stat=0.670, N=798)			an unconditional base transfer and additional amounts conditional on health check-ups and children’s school attendance
20	Kohler 2011	Adolescents and Adults	Malawi	Females and males; 16–75 years	Individual cash transfer (CCT)	1307 individuals	RCT	No effect (HIV status at round 3 β=0.001, robust SE=0.005)	Unprotected sex Women: No effect (Absolute change: 0.0% points); Men Absolute change: 5.2% point increase*	Any vaginal sex: men β:0.123** [se=0.049], women β:−0.074* [se=0.040]; days vaginal sex: men 0.514** [0.213]; women −0.153 [0.183]					Reported using a condom or reported not having sex : women Absolute change: 6.7% point decrease*; Men Absolute change: 9.0%**	Conditional • Negative HIV test after 1 year
21	DSD, SASSA and UNICEF 2012	Adoelscent- HH	South Africa	Females and males; 15- to 17-year-olds	Government cash transfer (UCT)	1231 adoelscents	Observational			Ever had sex Difference=0.160 STD=0.060 T-ratio=2.66;						CSG is a government social protection scheme that provides a monthly cash grant of ZAR 280/USD 18 to child caregivers in poor households; Unconditional
22	Zimbabwe Harmonised Social Cash Transfer Evaluation Team 2018; AIR 2014	Adoelscent- HH	Zimbabwe	Females and males; 13 to 24 years	Government cash transfer (UCT)	2,567 households; 2310 youth	Control comparison		condom used at first sex β:-0.067, se=-1.27- not significant. Had unprotected sex in past 3 months β:-0.047**, se=-2.33.	ever had sex β:-0.089**, -2.55	Number of partners last 12 months β:0.157, t-stat=1.57		age of partner at first sex (β:-0.251, t-stat:-0.41). Girls (β:0.051, t-stat:0.06). Boys: (β:-0.384, t-stat:-1.32). Most recent sex partner's age β:-0.334, t-stat:-0.65			The HSCT targets households that are both labour constrained and food poor as defined by the implementing agency, the Ministry of Public Service, Labour and Social Welfare (MPSLSW). Unconditional
23	Galárraga 2009	Adolescents	Mexico	Females and males; 12–24 years of age	Individual cash transfer (CCT)	3,743 individuals	Observational		Condom during first sexual intercourse (girls) impact of enrollement IV: 0.274 , 27.4% increase; factors in length of time in program IV: -0.020' 2.0% decrease Condom at last sexual intercourse (girls) IV: 0.173 17.3% increase IV: -0.021 2.1% decrease Condom during first sexual intercourse (boys) IV: 0.818 81.8% increase IV: -0.069, 6.9% decrease Condom at last sexual intercourse (boys) IV: 0.648…	Sexually active (girls) IV: 0.061 (impact of enrollment) IV: -0.004 (factors in length of time in program) Sexually active (boys) IV: -0.326 32.6% decrease IV: 0.034, 3.4% increase						Conditional - Participation in health promotion activities - School attendence
24	Humphries 2017	Adolescents	South Africa	Females and males ; 13 years of age and older Grade 9– 10	Individual cash transfer (CCT)	2949 youth	school matched pair cluster randomised control trial	Too few HIV infections (n=75) to assess impact on HIV						HSV-2 Incidence rate ratio*: 0.70 (CI: 0.57 to 0.86); p = 0.007		Any combination of 4 conditions being met: 80% quarterly participation in My Life! My Future! (4/year) Attaining passing score in 6-monthly academic tests (2/yr) an annual HIV test (1/yr) Submit report on their community project at end (once off).
1
1
1
1
1
1
1
1
1
1
1
1

## Sheet: More refined list
Citation	Target Popultion	Location	Population: Age and Sex	Category	Sample Size	Study Design	HIV	Condom Use	Sexual debut	Number of Partners	Transactional sex	Older Partners	Other STIs	Other	More desciption of study
Ssewamala 2010, Jennings 2015	OVC	Uganda	Both; 10–17 years	Savings	346	Cluster RCT								sig posiive HIV-preventive attitudinal scores (b = +0.19, ±0.09, p < .05) including condom use and HIV risk perception	matched CSA held in the adolescent orphan’s name. Conditional Attending 12 asset building and financial planning workshops
Cho 2011, Cho 2017	OVC	Kenya	Both; 12–14 years of age	school costs	105	Cluster RCT			−1.50(0.07 p-value)]- sig positive						unconditional
Baird 2012, Baird 2010, Baird 2017	Adolescents	Malawi	Females 13–22 years	Individual cash transfer	1289	Cluster RCT	Sig postiive- HIV Prevalence Adjusted OR: 0.36 (95% CI: 0.14,0.91)**	Not sig- Had unprotected sexual intercourse AOR 1·08 (0·67–1·75)	AOR 0·64 (0·38–1·07)- not sig			AOR 0·21 (0·07–0·62)*	HSV-2 Adjusted OR: 0.24 (95% CI: 0.09,0.65)**2 Syphillis prevalence AOR 0·92 (0·12–6·85)		CCT (based on at least 80% school attendance) or UCT
Minnis 2014	Adolescents	US	Females and males 16–21, self-identify as Latino	Individual cash transfer	162	Social etwork randomized RCT		OR 0.42, P=0.12	OR = 0.50, p = 0.04*						conditional on documented completion of the given activity
De Walque 2012 (PR); Cooper 2018;	Adults	Tanzania	18–30 years	Individual cash transfer	2399	RCT							STI incidence (Chlamydia trachomatis, Neisseria gonorrhoeae, Trichomonas vaginalis, Mycoplasma genitalium); Adjusted RR high-value : 0.73 (95% CI: 0.47,0.99)** Adjusted RR low-value transfer arm: 0.69 (95% CI: 0.45,0.92)** Combined measure of HIV, herpes simplex virus 2, syphilis. Prevalence High-value CCT (95% CI) ARR1.03 (0.74 to 1.32); Low-value CCT (95% CI); 0.82 (0.60 to 1.03)		Low and High amounts Conditional Negative STI test
Handa 2014, Rosenberg 2014;Handa 2017	OVC- HH	Kenya	age 15–25	Government cash transfer	2210 HH	Cluster RCT		last sex AOR 1.199 (0.826 – 1.741) any unprotected last 3 months AOR 0.901 (0.473 – 1.717)	AOR, 0.69; CI, 0.53 – 0.89*. sexual debut was −0.094 (stat sig at the 1% level)	AOR 0.584 (0.262 – 1.305)	AOR 0.843 (0.461 – 1.539)	Women AOR 0.94 (0.55, 1.62), chi sq=0.05, p=0.83) or Men (AOR 0.76 (0.43, 1.33), X2=0.93, P=0.33)			unconditional
Pettifor 2016	Adolescents	South Africa	Females 13–20	Individual cash transfer	2533	RCT	Incidenc 1·17, 95% CI 0·80–1·72, p=0·42).	Any unprotected in last 3 RR 0·81 (0·67 to 1·0)	HR 0·92 (0·78 to 1·08)	Any sex partner in last 12 months RR 0·90 (0·83 to 0·99)* Had >1 sex partner in last 12 months RR 0·86 (0·67 to 1·1)	RR 0·95 (0·78 to 1·15)	RR 0·90 (0·72 to 1·12)	HSV-2 HR 0·90 (0·69 to 1·19)		conditional on school attendance (≥80% of school days per month)
Cluver 2013; Cluver 2014; Cluver 2017	Adolescents- HH	South Africa	boys and girls age 12–18	Government cash transfer	3401	Case control		unprotected sex girls 0·91 (0·64–1·30); boys 0·77 (0·52–1·15)		multiple partners girls 0·77 (0·50–1·19); boys 0·67 (0·46–0·97)	girls lower incidence of transactional sex (OR = 0.49, p = 0.028); boys 1·10 (0·47–2·66)	girls lower age-disparate sex (OR = 0.29 p = 0.004); boys 0·67 (0·27–1·63)		one or more of four high-risk behaviours (Condom use, multiple partners, sex while intoxicated, sex before age 15). cash social protection was significantly reduced HIV-risk behaviour (OR 0.69 CI 0.50–0.95)	unconditional
Galárraga 2017;	Male Sex Workers	Mexico	male sex workers age 18–40; MSM	Individual cash transfer	227	RCT		Medium incentive (0.100* (se=0.056)) for staying STD free, high incentive STD free 0.113* (se=0.060), study visit incentive 0.106* (se=0.062)		Medium incentive (−0.133 (se=0.880)) for staying STD free, high incentive STD free (−0.115 (se=0.944)), study visit incentive (1.049 (se=0.993)			composite incident STIs (chlamydia, gonorrhea, syphilis, and HIV) was Medium incentive ( β:0.023 (se=0.024)) for staying STD free, high incentive STD free ( β:0.044 (se=0.034)), study visit incentive ( β:−0.006 (se=0.022))		arms 1 and 2 were conditional on STI status, unconditional arm 3
Goodman 2014; Goodman 2016	OVC- HH	Kenya	OVC-headed households (aged 13 to 25)	Individual cash transfer	1060	Observational		Females in cohort 3 (had 3 years of the program) that were sexually active in the last 6 months had a lower odds compared to cohort 1 of unprotected sex (OR 0.31 (0.11–0.86) p<0.05), Females in cohort 2 also had lower odds than cohort 1 (OR 0.36 (0.18–0.76) p<0.01). Males were the opposite (Cohort 3: OR 1.28 (0.4–3.89)) and (Cohort 2: OR 3.05 (1.27–7.35) (p<0.05)	Females in cohort 3 (had 3 years of the program) has odds of sexual initation that were half of those for females in cohort 1 (OR 0.48 (0.23–0.99) p<0.05), which had 1 year in the program. while females in cohort 2 also had lower odds than cohort 1 (OR 0.62 (0.32–1.19)). Males were the opposite: (Cohort 3: OR 1.16 (0.60–2.21)) and (Cohort 2: OR 1.94 (0.94–3.98) p<0.1)	Females in cohort 3 (had 3 years of the program) were not more likely females in cohort 1 to have multiple partners in the past year (OR 1.05 (0.42–2.6)). Females in cohort 2 were also similar to cohort 1 (OR 0.93 (0.43–2.05)). Males in Cohort 3 and 4 had higher odds than cohort 1: (Cohort 3: OR 1.2 (0.51–2.79)) and (Cohort 2: OR 1.65 (0.69–3.94)					Community-conditioned. Cash transfer decisions are facilitated by the working group through majority vote and are conditioned on the needs and survival strategies of participants. greater effects on partner number and condom use for females in the program longer
Nyqvist 2018	Adults	Lesotho	males and females age 18–32	Individual cash transfer	3029	RCT	incidence (OLS -0.025** p-value=-0.013) Prevlance (- 0.034* (p-value=0.018)	Any number of unprotected sex acts: any lottery 10.85* (5.89); high lottery -15.53** (6.95); low lottery -5.39 (7.65) effecton number of unprotected acts with a HIV positive partner (number of risky sex acts); Any lottery -1.97** (0.97); high lottery -2.67** (1.13); low lottery -1.15 (1.24)					STI prevalence (Syphillis and Trichomonoasis) ; Pooled internveiton OLS=-0.032*** se=0.009; high incentive (-0.034***(0.010)); low incentive -0.031***, (0.010); among HIV positive any incentive -0.108***(0.039)		Lottery incentive scheme (two prize levels: high prize of USD 100 and low prize of USD 50) held every 4 months for 2 years in which those who test negative for 2 curable STIs were eligibe
Hallfors 2015; Halifors 2011; Luseno 2015	OVC	Zimbabwe	orphan girls in grade 6 at baseline	School costs	328	Cluster RCT	HIV intervention 7 (4.5%), control 5 (4.1), chi sq=.03 (.86); AOR 1.15 (.47-2.79) in study no effect. Compared to overall population in DHS AOR 1.05 (0.32–3.49)- No effect compared to orphans in DHS		AOR .52 (.23-1.21) in study. In follow up comparing girls to those in overall population through DHS AOR 0.23*** (0.12–0.43)- signficiantly lower comapred to orphans in DHS				HSV-2 AOR 1.46 (0.50-4.26)
Heinrich 2017	adolescents- HH	South Africa	boys and girls 15-17	Government cash transfer	1531	Observational			As the number of months of CSG receipt increases, he probability that female adolescents abstain from sexual activity increases (difference ATE=0.055, se 0.030, p=0.071) no difference fpr males 0.047, se=0.044, p=0.293. Receipt in adolescence females (difference= 0.096, se=0.040, p-value=0.018); males (difference=0.030, se=0.051, p-value= 0.560)	As the number of months of CSG receipt increases, the number of sexual partners reported in adolescence decreases ((difference ATE= 0.235, se=0.090 p=0.009). No difference for males 0.144, se=0.108, p=0.182. For females, receiving grant early reduced the number of sexual partners (by one- fourth, -0.243, se=0.120, p=0.043) . For males, receiving the grant in adolescence also appears to reduce the…					unconditional
Witte 2015	female sex workers	Mongolia	females age 18+ involved in street-based sex work	savings	107	Group RCT		. We did not find a main effect of the Undarga Program group (IRR 1.08 (0.45, 1.72)), nor did we find a significant group · time interaction (P > .05; 1.01 (0.92, 1.09)).			No. Unprotected Vaginal Sex Acts for Pay Poisson, IRR (95% CI) a significant group · time interaction indicated that participants in the Undarga Program group exhibited a 22% greater decrease than those in HIVSRR-alone group for each time point (IRR 0.78** (0.67, 0.71).
Duflo 2006; Duflo 2015	Adolescents	Kenya	Grade 6 at enrollment (both boys nad girls)	School costs	70,000 328 schools	Cluster RCT		Ever used condom (Girls) β: 0.003; se=0.019; boys β:-0.003; se=0.016 Condom at last sex (girls) β: 0.024, se= 0.019; boys β:0.011, se=0.014	Ever had sex (girls) OLS estimates β: -0.023** se=0.004; boys: β:0.008, se=0.015	>1 partner (girls) β: -0.001; se=(0.004); boys β:-0.001; se=(0.010); both not significant					unconditional
Siaplay 2012	Adolescent- HH	South Africa	Youth ages 14-26?, male and female	Government cash transfer	3307	Observational		No significant impact on self-reported condom use by young adults (females and males ages 14-26). Effect size (for any OAP, with attrition correction) is -0.064 for females and -0.041 for males.	Sexual debut for adolescents 14-18 ONLY. Any OAP receipts reduce the probability of young adult females sexual debut. (- 0.168** and -0.136*, without and with attrition correction, respectively). .On the contrary, a male receiving the pension has no significant effect on the probability of young adults starting sex.	Effect size (for any OAP, with attrition correction) 0.031 for females and -0.054 for males					The South African Old-Age Pension (OAP): A government pension program that provideda monthly cash transfer of up to $75 USD to poor women more than 60 years old and poor men more than 65 years oold. unconditional
AIR 2015	Adolescent- HH	Zambia	Target HH with OVC. Adolescents were 13-17 at baseline and 16-20 at 36 month FU (Both males and females)	Government cash transfer	3077 households	RCT		36 month impact on condom use at first sex = 0.010 but not statistically significant among n=1,070 adolescents who had not debuted at baseline. 36 month impact on no condom use in last 3 months among those with reported sexual activity (n=1,077) = -0.032 but not statistically significant. 36 month impact on no condom use in last 12 months among n=1422 adolescents -0.018 but not statistically sign…	36 month impact on age at first sex= -0.101 but not statistically significant among n=1,070 adolescents who had not debuted at baseline. The 36 month impact on ever had sex was 0.008 but not statistically significant among n=3,249 adolescents who had not sexually debuted at baseline.	36 month impact on number of partners in last 12 months among adolesents reporting having a partner (n=2089) = -0.332 but not statistically significant.	36 month impact on ever expereinced transactional sex was 0.016 among 1756 adolescents but this was not statistically significant.	36 month impact on partner age at first sex > 10 years older = 0.039 and statistically significant at 5% level among n=1,070 who had not debuted at baseline.			unconditional
Malawi Social Cash Transfer Program Evaluation Team 2016	Adoelscent HH	Malawi	sexual behaviors asked for ages of 13-19 (at baseline, 15-22 at endline) (both sex)	Government cash transfer	3521 HH	RCT		No effects but small samples. among young who had se xn=380 at midline and n=680 at endline condom use at first sex endline (coef=-0.048, se=-1.20) midline(coef=-0.025, se=-0.53). Condom use at last sex (endline coef=-0.019, se=-0.51 N=478; midline coef=0.019, se=0.35, N=274); Unprotected sex (last 3 months) endline (coef=0.023, se=0.41 N=308) midline (coef= 0.046, se=0.56, N=180)	Asked for 1,635 youth at midline, 1,515 at endline. respondents in SCTP households were more likely to delay their first sexual encounter at midline (6 pp (all HH β:-0.062*** t-stat:-3.41), all sig among poorest 50% β: -0.053*). midline males only ( β:-0.085***, t-stat:-4.26), , N=692). midline females only ( β:-0.039, t-stat:-1.69, N=823) endline all households β: -0.024 t-stat:-0.74. all housho…	No sig effects but small samples. numbe of sexual partners endline (coef=-0.118, se=-1.27, N=478) midline (-0.053, se=-0.45, N=274)	No sig effects but small samples. Ever TS endline (coef=-0.016, se= -0.32, N=680), at midline (coef=-0.024, se=-0.34) Gave or received money for sex with most recent partner among those who debuted with recent partnership endline (0.065, se=1.04, N=478), midline (coef=-0.070, se=-1.13, N=274);	Signficiant effects on partner age at endlie but small samples. among young who had sex n=380 at midline and n=680 at endline. First sex age disparate partner (>5 years) endline(coef= -0.033**, se=-2.49) midline (0.023, se=1.23); partner age at first sex endline (coef=-0.513*, se=-1.77), midline (coef=0.153, se=0.52). Among those reporting debut and recent sexual partnership, age-dispaarte relati…			unconditional cash transfer programme targeted to ultra-poor, labour-constrained households.
UNICEF 2018	Adolescent- HH	Tanzania	youths who were between the ages of 14 and 28 years at baseline (15–30 years at endline) (both Mand F)	Government cash transfer	1397	Cluster RCT		Did not use condom at last sex (within last 12 months) overall (coef=-0.008, t-stat=-0.235, N=1,992) Females (coef=-0.034, t-stat=-0.691, N=1,004) males (coef=0.012, t-stat=0.214, N=988)	everyone coef=0.018, t-stat=0.436, N=1,978; females coef=0.005, t-stat=0.098, N=1,002; males coef=0.024, t-stat=0.379, N=976	Lifetime number of partners everyont (coef=0.212, t-stat=0.634, N=1,960) females (coef=-0.232, t-stat=-1.022, N=998); males (coef=0.612, t-stat=1.081, N=962) . Partners in the last 12 monts everyone (coef=0.140, t-stat=1.027, N=1,978) females (coef=0.089, t-stat=0.678, N-1,002) males (coef=0.183, t-stat=0.809 , N=976)	Received food, favours, gifts or money for sex (last 12 months) everyone (coef=0.011, t-stat=0.389, N=1,842) also no effect when split by female and male. Gave food, favours, gifts or money for sex (12 months) everyone (coef=0.016, t-stat=0.631, N=1840) also no effect when split by female and male. Gave or received food, favours, gifts or money for sex (12 months) everyone (coef=0.013, t-stat=0.3…	Last sex: partner 5 or more years older/younger everyone (coef=0.010, t-stat=0.307, N=1,696) females (coef=-0.002, t-stat=-0.041, N=898) males (coef=0.021, t-stat=0.670, N=798)			an unconditional base transfer and additional amounts conditional on health check-ups and children’s school attendance
Kohler 2011	Adolescents and Adults	Malawi	Females and males 16–75 years of age	Individual cash transfer	1307	RCT	No effect (HIV status at round 3 coef=0.001, robue SE=0.005)	Women: No effect (Absolute change: 0.0% points); Men Absolute change: 5.2% point increase*		Any vaginal sex: men β:0.123** [se=0.049], women β:−0.074* [se=0.040];				Reported using a condom or reported not having sex : women Absolute change: 6.7% point decrease*; Men Absolute change: 9.0%**	Conditional • Negative HIV test after 1 year
DSD, SASSA and UNICEF 2012	Adoelscent- HH	South Africa	15- to 17-year-olds benefiting from the Child Support Grant (CSG) and matched controls (both M and F)	Government cash transfer	1231	Observational			Adolescents in households currently receiving the CSG were statistically significantly less likely (by 16 percentage points) to have ever had sex compared to those in households not currently receiving the grant. Diference=0.160 STD=0.060 T-ratio=2.66;						CSG is a government social protection scheme that provides a monthly cash grant of ZAR 280/USD 18 to child caregivers in poor households; Unconditional
Zimbabwe Harmonised Social Cash Transfer Evaluation Team 2018; AIR 2014	Adoelscent- HH	Zimbabwe	youth 13 to 24 years living in HH that are poor or labor constrained (Both M and F)	Government cash transfer	2,567 households; 2310 youth	Control comparison		condom used at first sex β:-0.067, se=-1.27- not significant. Had unprotected sex in past 3 months β:-0.047**, se=-2.33.	ever had sex signifitcant effect reduce likelihodo by 9% β:-0.089**, -2.55 representing an 11 per cent decrease over the baseline mean of 82 per cent.	Number of partners last 12 months β:0.157, t-stat=1.57		age of partner at first sex β:-0.251, t-stat:-0.41)- no signficiant. Girls β:0.051, t-stat:0.06. Boys: β:-0.384, t-stat:-1.32. Most recent sex partner's age β:-0.334, t-stat:-0.65			The HSCT targets households that are both labour constrained and food poor as defined by the implementing agency, the Ministry of Public Service, Labour and Social Welfare (MPSLSW). Unconditional
Galárraga 2009	Adolescents	Mexico	Females and males 12–24 years of age	Individual cash transfer	3,743 individuals	Observational		Condom during first sexual intercourse (girls) impact of enrollement IV: 0.274 , 27.4% increase; factors in length of time in program IV: -0.020' 2.0% decrease Condom at last sexual intercourse (girls) IV: 0.173 17.3% increase IV: -0.021 2.1% decrease Condom during first sexual intercourse (boys) IV: 0.818 81.8% increase IV: -0.069, 6.9% decrease Condom at last sexual intercourse (boys) IV: 0.648…	Sexually active (girls) IV: 0.061 (impact of enrollment) IV: -0.004 (factors in length of time in program) Sexually active (boys) IV: -0.326 32.6% decrease IV: 0.034, 3.4% increase						Conditional - Participation in health promotion activities - School attendence
Humphries 2017	Adolescents	South Africa	Females and males 13 years of age and older Grade 9– 10	Individual cash transfer	2949	school matched pair cluster randomised control trial	Too few HIV infections (n=75) to assess impact on HIV						HSV-2 Incidence rate ratio*: 0.70 (CI: 0.57 to 0.86); p = 0.007		Any combination of 4 conditions being met: 80% quarterly participation in My Life! My Future! (4/year) Attaining passing score in 6-monthly academic tests (2/yr) an annual HIV test (1/yr) Submit report on their community project at end (once off).
